# Supplementary material for: Lower androgen levels promote abnormal cartilage development in female patients with adolescent idiopathic scoliosis
Source: PubMed Central journal article supplement — Ann Transl Med. 2021 May;9(9):784. doi: 10.21037/atm-20-3171 (PMC8246169; doi:10.21037/atm-20-3171), 2021-05
Supplement: atm-09-09-784-supplementary.pdf [file atm-09-09-784-supplementary.pdf]

**Table S1** siRNA sequences used in this study

| SiRNA     | Sequences                                                                        |
|-----------|----------------------------------------------------------------------------------|
| siAR 1    | Sense: 5'-GGCAAGAGCACUGAAGAUAdTdT-3'<br>Antisense: 5'-UAUCUUCAGUGCUCUUGCCdTdT-3' |
| siAR 2    | Sense: 5'-CUGCUACUCUUCAGCAUUAdTdT-3'<br>Antisense: 5'-UAAUGCUGAAGAGUAGCAGdTdT-3' |
| siControl | Sense: 5'-UUCUCCGAACGUGUCACGdTdT-3'<br>Antisense: 5'-ACGUGACACGUUCGGAGAAdTdT-3'  |

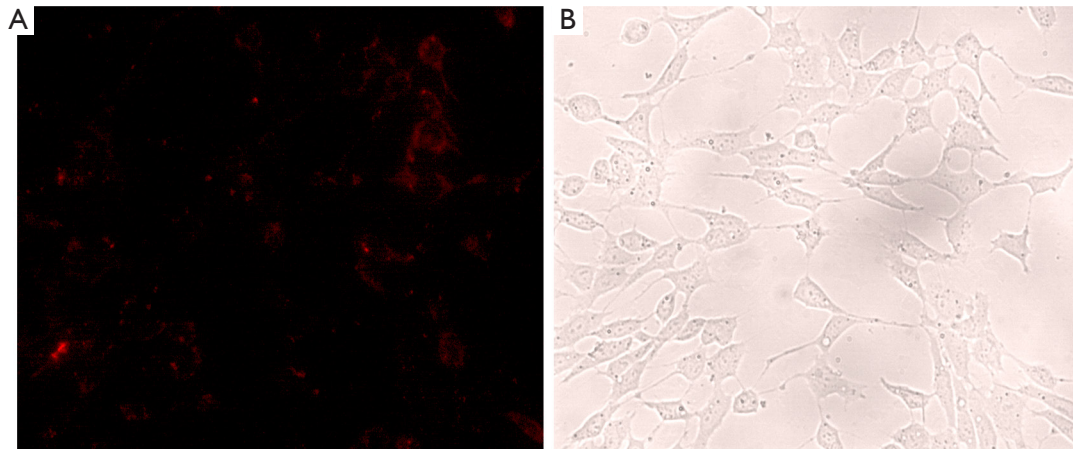

**Figure S1** Primary chondrocytes of AIS patients were transfected with the siRNA. (A) AR was labeled with red fluorescence, 400x, strong signals of AR were observed in the cells transfected (B).

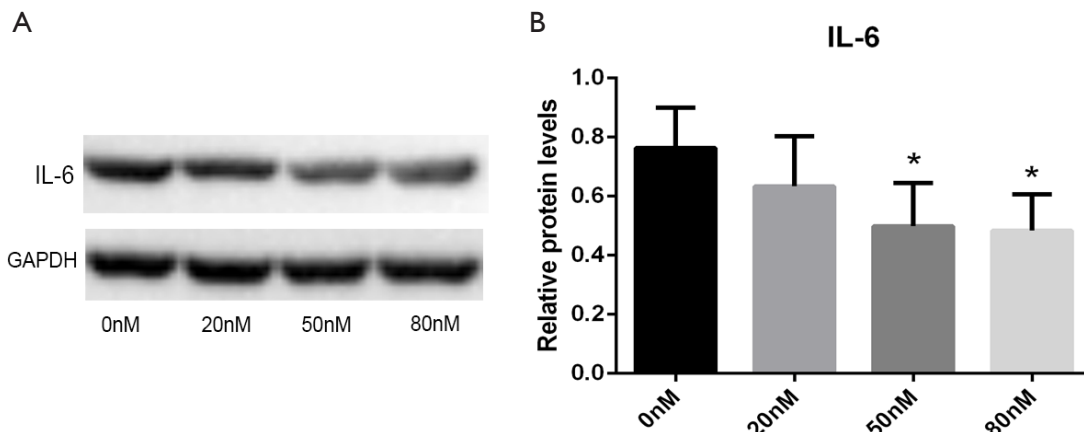

**Figure S2** The effect of androgen intervention is effective when the concentration is 50nM/80nM. (A,B) the expression of IL-6 after treating with gradient concentration of androgen. \*indicates P<0.05 vs. the control group.

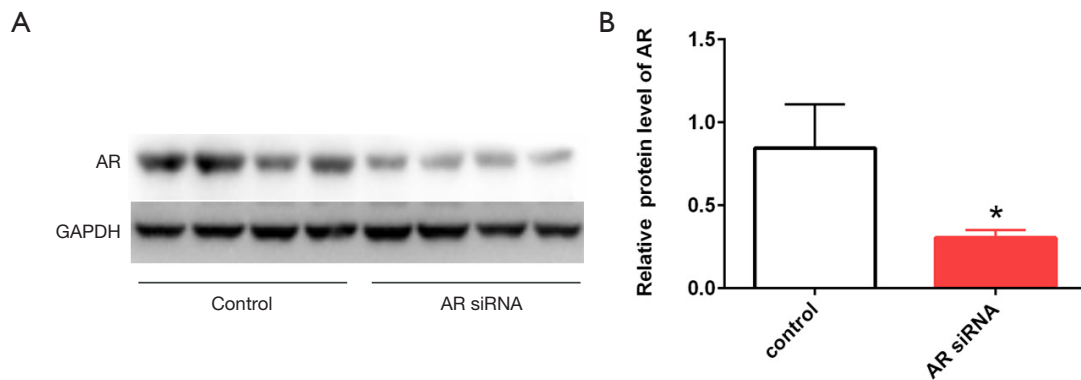

**Figure S3** (A,B) The expression level of AR protein in AIS primary chondrocytes 48 h after transfection. \*indicates  $P < 0.05$  vs. the control group.

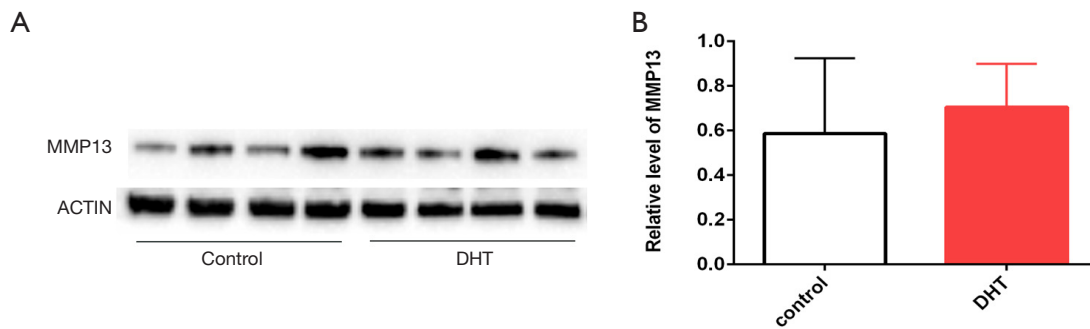

**Figure S4** The expression of MMP13 did not significantly change after androgen treatment. (A,B) the protein level of MMP13 in chondrocytes from AIS patients after DHT treatment. \*indicates  $P < 0.05$  vs. the control group.

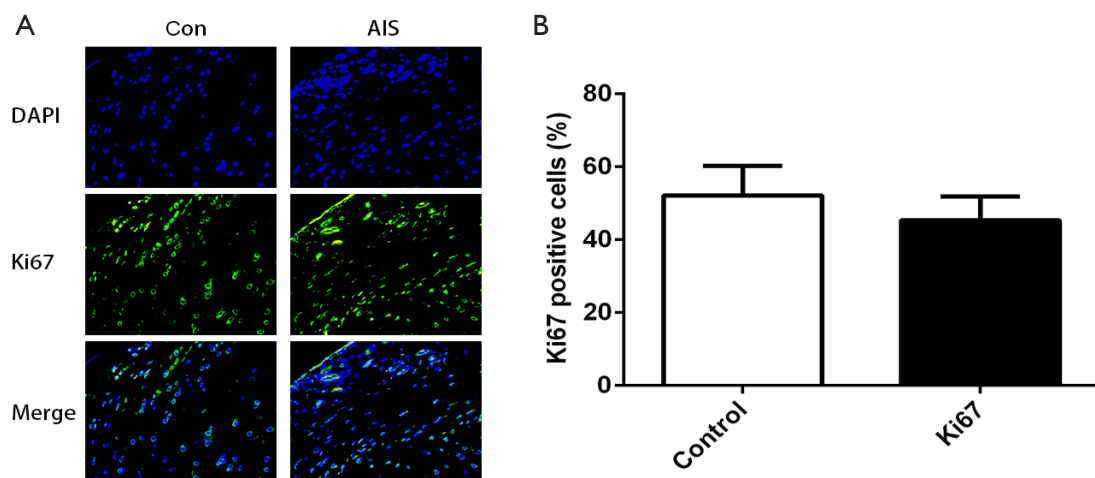

**Figure S5** The proliferation of chondrocytes in cartilage from AIS and non-AIS patients. (A,B) There was no significant difference between two groups (green signal), 400 $\times$ .
